## 17      **Abstract**

18      Vitamin D functions as a potent immunomodulator by interacting with many immune cells  
19      however, its role in regulating inflammation in the epicardial adipose tissue (EAT) is unclear. In  
20      the EAT of atherosclerotic microswine that were fed with deficient, sufficient or supplemented  
21      levels of vitamin D, we evaluated the phenotype of the macrophages. Vitamin D treatment was  
22      continued for 12 months and serum 25(OH)D levels were measured regularly. Infiltration of  
23      M1/M2 macrophage was investigated by immunostaining for CCR7 and CD206, respectively in  
24      conjunction with a pan macrophage marker CD14. Significant difference in the number of  
25      CCR7+ cells was observed in the EAT from vitamin D-deficient swine compared to vitamin D-  
26      sufficient or -supplemented swine. Expression of CD206 correlated with high levels of serum  
27      25(OH)D indicating a significant increase in M2 macrophages in the EAT of vitamin D-  
28      supplemented compared to -deficient swine. These findings suggest that vitamin D-deficiency  
29      exacerbates inflammation by increasing pro-inflammatory M1 macrophages, while vitamin D-  
30      supplementation attenuates the inflammatory cytokines and promotes M2 macrophages in EAT.  
31      This study demonstrates the significance of vitamin D mediated inhibition of macrophage  
32      mediated inflammation in the EAT during coronary intervention in addition to its  
33      immunomodulatory role. However, additional studies are required to identify the cellular  
34      mechanisms that transduce signals between macrophages and smooth muscle cells during  
35      restenosis in the presence and absence of vitamin D.

## 36 **Introduction**

37           The epicardial adipose tissue (EAT) is the visceral fat of the heart. It lies near coronary  
38 arteries and in continuity with the myocardium. Physiologically, EAT is different from other  
39 visceral fat. EAT is a metabolically active tissue that secretes several bio-active molecules which  
40 have paracrine and vasocrine effects in the coronary artery causing vascular dysfunction and  
41 atherosclerosis (Sacks and Fain 2007; Iacobellis and Bianco 2011). EAT also secretes pro-  
42 inflammatory adipokines, including interleukin-6 (IL-6), tumor necrosis factor-alpha (TNF- $\alpha$ ),  
43 and monocyte chemoattractant protein-1 (MCP-1) and anti-inflammatory adipokines, including  
44 adiponectin. These evidences suggest the role of EAT in establishing a chronic inflammatory  
45 environment that could lead to atherosclerosis of the adjacent coronary arteries (Mazurek et al.  
46 2003). The tissue macrophage in EAT exists in different phenotype; pro-inflammatory M1  
47 macrophage or anti-inflammatory M2 macrophages. Recent studies have reported that pro-  
48 inflammatory M1 macrophages are increased and anti-inflammatory M2 macrophages are  
49 decreased in EAT in patients with coronary artery disease (CAD) (Hirata et al. 2011).

50

51           Deficiency of 25-hydroxy vitamin D [25(OH)D] is found to be associated with several  
52 medical conditions, such as diabetes and insulin resistance (Scragg et al. 1995), metabolic  
53 syndrome (Hypponen et al. 2008), myocardial infarction (Scragg et al. 1990), and cardiovascular  
54 diseases (Wang et al. 2008). According to a survey conducted by the Institute of Medicine, 32%  
55 of the US population aged 1 years or above had inadequate or deficient levels of serum 25(OH)D  
56 (Looker et al. 2011). The numbers are even worse in elderly, who are the high-risk group for  
57 these diseases, with almost half of their population deficient in vitamin D (Norman et al. 2007).

58 There are some reports implicating a detrimental effect of vitamin D-deficiency in promoting  
59 atherosclerosis (Wang et al. 2008; Norman and Powell 2005). However, most of these reports are  
60 based on epidemiological pooled data from observational studies and there is still a controversial  
61 role of vitamin D-deficiency in causation or worsening of CAD and whether vitamin D-  
62 supplements can help prevent ischemic heart diseases (Ku et al. 2013).

63

64 Vitamin D exerts its function through vitamin D receptor (VDR). Many studies have  
65 indicated a clear link between vitamin D-deficiency and cardiovascular diseases, however, the  
66 reports showed conflicting results which were attributed to the variations in the study design,  
67 bioavailability, mutations in the VDR, and the variable concentration of vitamin D in different  
68 tissues. Specific details about the benefits of vitamin D supplementation and its association with  
69 cardiovascular diseases was recently reviewed (Mozos and Marginean 2015). Gene  
70 polymorphism and genetic differences in VDR have been identified as variable factors in human  
71 population which would account for the individual differences in response to vitamin D  
72 treatment (Levin et al., 2012). The ethnic and geographical distribution of the population, and the  
73 incidence of cardiovascular diseases in these populations suggests the need for vitamin D  
74 supplementation in reducing the risk associated with different cardiovascular diseases (Levin et  
75 al., 2012). In a recent randomized placebo controlled human clinical trial, supplementation with  
76 vitamin D3 was found to effectively raise higher vitamin D levels in the blood than  
77 supplementation with vitamin D2 (Lehmann 2013). Thus, suggesting that the bioavailability of  
78 vitamin D depends on the type of isoform of vitamin D and its intake which is critical to  
79 maintaining the normal healthy levels of vitamin D in the blood.

80

81           The purpose of the present study is to identify the influence of vitamin D treatment on the  
82 EAT which reflects on the pro-inflammatory signaling in the coronary arteries that may have a  
83 profound influence on stenosis. We hypothesize that vitamin D deficiency enhances production  
84 of pro-inflammatory regulators in the EAT. Therefore, inhibition of EAT dependent regulation of  
85 pro-inflammatory signaling through vitamin D supplementation is critical to lower cellular  
86 inflammation in coronary arteries. In this study, we examined if vitamin D deficiency increases  
87 the M1/M2 macrophage ratio in EAT and thus predisposes to the development of coronary artery  
88 disease, and also evaluated whether vitamin D-supplementation would decrease M1/M2  
89 macrophage ratio in atherosclerotic swine model.

90

## 91 **Materials and Method**

92           The Institutional Animal Care and Use Committee of Creighton University approved the  
93 research protocol (IACUC#0830) and the animals were housed and maintained in the Animal  
94 Resource Facility of Creighton University, following the rules and regulations of NIH and  
95 USDA. Yucatan female microswine of 30-40 lbs were obtained from Sinclair Laboratories,  
96 Columbia, MO, USA. The microswine were fed a high cholesterol diet (Harlan Laboratories)  
97 contained the following major ingredients: 19% casein “vitamin free”, 23.5% sucrose, 23.9%  
98 corn starch, 13% maltodextrin, 4% soybean oil, 4% cholesterol, 20% chocolate mix, and 10%  
99 cellulose. Vitamin D-sufficient high cholesterol diet (Harlan, USA) was prepared with the  
100 following major ingredients: 37.2% corn (8.5% protein), 23.5% soybean meal (44% protein),  
101 20% chocolate mix, 5% alfalfa, 4% cholesterol, 4% peanut oil, 1.5% sodium cholate, and 1%

102 lard. The diet was either deficient in vitamin D or supplemented with 2,000 IU/d or 4,000 IU/d of  
103 Vitamin D<sub>3</sub>. Serum 25(OH)D levels were measured regularly by collecting the blood from  
104 auricular vein at baseline, before the coronary intervention and before the time of euthanasia.  
105 Serum levels of 25(OH)D were measured to determine the vitamin D status in the swine which  
106 were placed into their respective experimental groups based on the 25(OH)D levels and diets.

107

108         The animals were fed with the experimental diet for 6 months. Steps to prevent the  
109 thrombosis were taken by administering aspirin (325 mg/day) and ticlopidine (250 mg/day) to all  
110 animals three days prior to the procedure. After scrubbing and sterile draping access to the  
111 vascular system will be obtained after femoral cut down and exposure of the femoral artery.  
112 After puncturing the femoral artery, the 6F sheath was introduced to keep the artery open. After  
113 placement of sheath, an angiographic guiding catheter (6F AR2/100cm) is introduced and pushed  
114 all the way to coronary arteries on a guiding wire. Fluoroscopic evaluation is performed by  
115 administering non-ionic contrast media which is injected into the coronary arteries for  
116 fluoroscopic evaluation using C arm (OEC 9900 Elite Vas 8, GE Healthcare). Clinical  
117 "coronary-type" angioplasty catheter with a balloon size of 2.5 mm x 15 mm will be gently  
118 pushed on the guide wire, until its deflated balloon is inside the left circumflex (LCX) coronary  
119 artery, single complete balloon inflation to 10-15 atm. pressure, depending upon the vessel  
120 diameter using the inflation device with a pressure gauge (basix touch<sup>TM</sup>), then balloon is  
121 deflated, and the patency of the artery will be checked by performing angiography. Following the  
122 completion of the procedure, the catheters were removed, and the femoral artery was sutured  
123 with prolene, and the leg incision was closed with vicryl.

124 Angiogram and optical coherence tomography (OCT) imaging were performed using C7-XR  
125 OCT intravascular imaging system (St. Jude Medical, St. Paul, MN) at 6 months post-coronary  
126 intervention. High dose of barbiturates (Beuthanasia-D, 0.1 ml/lb, i.v.) was administered to  
127 euthanize the animal. Swine hearts were removed quickly after euthanasia and the EAT  
128 surrounding the coronary arteries were stripped and fixed in 10% formalin buffer for 24 hrs. The  
129 tissues were handled in a Sakura Tissue Tek VIP Tissue Processor and embedded in paraffin.  
130 Sections were cut at a thickness of 5 $\mu$ m using a microtome (Leica, Germany) and subsequently  
131 placed on slides for immunofluorescence evaluation.

132

### 133 **Hematoxylin and Eosin staining**

134 Tissue sections were routinely stained with hematoxylin and eosin; Tissue sections were  
135 viewed with a Nikon<sup>TM</sup> Eclipse Ci microscope and images were photographed with a Nikon<sup>TM</sup> DS-  
136 L3 camera. The percentage of stenosis ( $[1-(\text{Lumen area}/\text{Internal elastic lamina area})] * 100$ ) of post  
137 angioplasty coronaries were grouped and analyzed statically by using one way ANOVA from  
138 Graphpad Prism6<sup>TM</sup> software.

139

### 140 **Immunofluorescence**

141 Tissue sections on the slides were deparaffinized in xylene, rehydrated in ethanol, washed in  
142 double-distilled water and treated with Lab Vision<sup>TM</sup> HIER Buffer L ph9 (Thermo Fisher Scientific  
143 Inc,) at 90°C for 20 minutes. The slides were then washed three times for 3 minute each using 1x  
144 phosphate buffered saline (PBS) and then were blocked in normal horse serum from Vector<sup>TM</sup>

145 Laboratories for 2 hours at room temperature. The primary antibodies included: mouse anti VDR  
146 (SC 13133: SCBT™), rabbit anti MCP1 (Ab 9669; Abcam™), rabbit anti TNF- $\alpha$  (Ab 6671;  
147 Abcam™), mouse anti CD14 (Ab 182032; Abcam™) and a combination of either rabbit anti CCR7  
148 (Ab 32527; Abcam™) or rabbit anti CD206 (Ab 64693; Abcam™) were added overnight at 4°C.  
149 The following day, the slides were rinsed in 1x PBS and the secondary antibody (Abcam™® goat  
150 polyclonal to rabbit IgG FITC Ab97199 or Invitrogen Alexa-Fluor® 594 goat anti-mouse IgG)  
151 was added and incubated on the slides for 2 hours at room temperature. Sections were washed in  
152 1x PBS and nuclei were counterstained with Vector™ laboratories DAPI. Pictures were taken with  
153 Olympus BX-51 epifluorescent microscope and images were photographed with an Olympus  
154 DP71 camera. The images were then quantified using CellSens™ Dimension software. A region  
155 of interest (ROI) was drawn around individual nuclei. The software quantified the protein  
156 expression in mean intensity value for each nucleus. The 40x images were quantified from each  
157 EAT section per swine. The data from each experimental group of swine (vitamin D-deficient,  
158 vitamin D-sufficient, and vitamin D-supplemented) were grouped and analyzed statistically by  
159 using one-way ANOVA using GraphPad Prism6™ software. For Double immunofluorescence  
160 staining the 40x images were manually analyzed by two observers and the average of the positive  
161 cell count was used for statistical analysis. There was less than 5% variation between the observers.

162

## 163 **Statistical analysis**

164 The immunofluorescence data were analyzed by GraphPad Prism 6.0 (GraphPad Software,  
165 Inc). The values are presented as mean  $\pm$  SEM. One-way ANOVA with Turkey's multiple  
166 comparison test was used to analyze significant differences in mean fluorescence index (MFI) in



167 each cytokine within the experimental groups, and positive cell count for CCR7<sup>+</sup> and CD206<sup>+</sup> cells  
168 in the experimental groups. The data in Fig 2I, 6A, and 6B were analyzed via non-linear regression  
169 and fit with exponential decay lines. A p value of <0.05 was considered statistically significant.

170

## 171 **Results**

### 172 **Evaluation of serum 25(OH)D levels in different animal groups**

173 Animals were classified into three groups based on the measured serum 25(OH)D levels.  
174 Group 1. Animals with  $\leq 20$  ng/ml of 25(OH)D were grouped as vitamin D-deficient, Group 2.  
175 Animals with the serum levels of 25(OH)D ranging between 30-44 ng/ml were grouped as  
176 vitamin D sufficient, and Group 3. Animals with more than 44 ng/ml of 25(OH)D in serum were  
177 grouped as vitamin D-supplemented. Each of these experimental group animals had a sample  
178 size of 3 for a total of 9 swine in this study. The mean serum 25(OH)D levels observed in the  
179 three experimental groups were: deficiency  $17.1 \pm 1.6$  ng/ml, sufficient  $37.4 \pm 3.7$  ng/ml, and  
180 supplemented  $58.06 \pm 4.4$  ng/ml. Fig 1, shows the mean serum 25(OH)D levels in different  
181 animal groups with SEM. Serum 25(OH) D level in vitamin D-deficient was lower compared to  
182 vitamin D-sufficient ( $p < 0.014$ ) and vitamin D-supplemented swine ( $p < 0.0004$ ). The serum  
183 25(OH) D level in vitamin D-sufficient was lower compared to vitamin D-supplemented swine  
184 ( $p < 0.013$ ).

185

186 **Fig 1: Evaluation of serum 25(OH)D levels in different animal groups.** Serum 25(OH) D  
187 level in vitamin D-deficient (Vit.D.Def.), vitamin D-sufficient (Vit.D.Suf.) ( $p < 0.014$ ) and  
188 vitamin D-supplemented swine (Vit.D.Sup.) ( $p < 0.0004$ ).

189

## 190 **Hematoxylin and eosin stain**

191 The area of neo-intimal region (Fig 2A-C) following angioplasty of coronary arteries was  
192 greater in vitamin D-deficient compared to vitamin D-sufficient and vitamin D-supplemented  
193 swine. The percentage restenosis (Fig 2G) in post angioplasty coronary arteries was greater in  
194 vitamin D-deficient swine ( $62.41 \pm 4.067\%$ ) compared to vitamin D-sufficient ( $37.90 \pm 4.264\%$ )  
195 ( $p < 0.003$ ) and to vitamin D-supplemented swine ( $31.94 \pm 2.780\%$ ) ( $p < 0.0005$ ).

196

## 197 **Fig 2: Hematoxylin and Eosin (H&E) staining and expression of vitamin D receptor (VDR).**

198 (A-C) shows the H&E staining of post-balloon angioplasty site of the left circumflex coronary  
199 artery (LCx); (D-F) shows the effect of vitamin D on vitamin D receptor (VDR) expression in  
200 EAT of: vitamin D-deficient (Vit.D.Def.), vitamin D-sufficient (Vit.D.Suf.) and vitamin D-  
201 supplemented (Vit.D.Sup.) groups; (G) shows the percent stenosis. (n=3 in each treatment group);  
202 \*\*\* $p < 0.0005$ , \*\* $p < 0.003$ . (H) The mean fluorescent intensity (MFI) was measured for VDR+cells  
203 in each treatment group. (n=3 in each experimental group); \* $p < 0.04$ . (I) A scatter plot showing the  
204 MFI of VDR with change in the serum 25(OH) D level.

205

## 206 **Expression of VDR in EAT**

207 VDR expression in EAT (Fig 2D-F) was significantly higher in the vitamin D-deficient  
208 (MFI  $13.06 \pm 2.40$ ) swine compared to vitamin D-sufficient (MFI  $5.04 \pm 1.54$ ) ( $p = 0.03$ ) and  
209 vitamin D-supplemented (MFI  $5.59 \pm 0.17$ ) ( $p = 0.04$ ) swine (Fig 2H). But, no significant

210 difference was seen between vitamin D-sufficient (MFI  $5.04 \pm 1.54$ ) and vitamin D-  
211 supplemented (MFI  $5.59 \pm 0.17$ ) (p=0.9) swine. Serum 25(OH)D levels was inversely related to  
212 VDR expression in EAT. Fig 2I illustrates the relationship between VDR expression in the EAT,  
213 measured by fluorescent intensity, and serum 25(OH)D levels in each pig. A non-linear  
214 relationship is described by the exponential decay line as shown. The R-squared value is 0.5328.

215

### 216 **Expression of MCP1 and TNF- $\alpha$ in EAT**

217 The TNF- $\alpha$  expression (Fig 3A-C) was significantly greater in EAT of vitamin D-  
218 deficient (MFI  $107.0 \pm 2.34$ ) swine compared to vitamin D-sufficient (MFI  $60.15 \pm 2.15$ )  
219 (p<0.0001) and vitamin D-supplemented (MFI  $48.35 \pm 1.66$ ) (p<0.0001) swine. There was also  
220 significant increase in the expression of TNF- $\alpha$  in the EAT of sufficient (MFI  $60.15 \pm 2.15$ )  
221 swine compared to a supplemented swine (MFI  $48.35 \pm 1.66$ ) (p=0.001) (Fig 3G).

222

223 The MCP1 expression in EAT (Fig 3D-F) was significantly greater in vitamin D-deficient  
224 (MFI  $170.4 \pm 1.68$ ) swine compared to vitamin D-sufficient (MFI  $131.4 \pm 1.51$ ) (p<0.0001) and  
225 vitamin D-supplemented swine (MFI  $117.1 \pm 2.04$ ) (p< 0.0001). There was also significant  
226 difference in MFI for MCP1<sup>+</sup> cells in the EAT between vitamin D-sufficient (MFI  $131.4 \pm 1.51$ )  
227 and vitamin D-supplemented swine (MFI  $117.1 \pm 2.04$ ) (p< 0.0001) (Fig 3H).

228

229 **Fig 3: Effect of vitamin D on TNF- $\alpha$  and MCP1 expression.** Comparison of

230 Immunofluorescence staining for TNF- $\alpha$  (A-C) and MCP1 (D-F) cells in the EAT of: vitamin D-

231 deficient (Vit.D.Def.), vitamin D-sufficient (Vit.D.Suf.) and vitamin D-supplemented  
232 (Vit.D.Sup.) groups. (G) The mean fluorescent intensity (MFI) values for TNF- $\alpha$ <sup>+</sup> cells were  
233 measured for each treatment group. (H) The MFI values for MCP1 cells were measured for each  
234 treatment group. Data show the MFI  $\pm$  SEM (n=3 in each treatment group); \*\*p <0.0012. \*\*\*\*p  
235 <0.0001.

236

### 237 **CD14/CCR7 and CD14/CD206 expression in EAT**

238 The double immunostaining for CD14 and CCR7 (Fig 4A-I) was performed to identify M1  
239 macrophages in the EAT. There were significantly more number of cells expressing CCR7 (M1  
240 macrophages) in the EAT of vitamin D-deficient swine ( $9.86 \pm 0.32$ ) compared to vitamin D-  
241 sufficient swine ( $3.20 \pm 0.24$ ) (p<0.0001); and to vitamin D-supplemented swine ( $2.43 \pm 0.19$ )  
242 (p<0.0001). The cell counts of CCR7<sup>+</sup> cells in the EAT of vitamin D-supplemented swine were  
243 not statistically different from those in vitamin D-sufficient swine (p =0.11) (Fig 4J).

244

245 **Fig 4: Effect of vitamin D on CD14/CCR7 expression.** (A-I) Double immunofluorescence  
246 staining for CCR7 and CD14 in EAT of: vitamin D-deficient (Vit.D.Def.), vitamin D-sufficient  
247 (Vit.D.Suf.) and vitamin D-supplemented (Vit.D.Sup.) groups. (A-C) Cy-3 (red) images are  
248 CCR7<sup>+</sup> Cells. (D-F) FITC (green) images are all CD14<sup>+</sup> Cells. (J) Data reveal that more cells  
249 were expressing CCR7 in vitamin D-deficient swine and lower in vitamin D-supplemented swine  
250 than with vitamin D-sufficient swine. (n=3 in each treatment group); \*\*\*\*p <0.0001.

251

252 The double immunostaining with CD14 and CD206 (Fig 5A-I) was performed to identify  
253 macrophages of the M2 phenotype in the EAT. The density of CD206<sup>+</sup> cells in the EAT of vitamin  
254 D-deficient swine (mean  $4.86 \pm 0.41$ ) was found to be significantly less than those in vitamin D-  
255 sufficient swine (mean  $10.63 \pm 0.55$ ) ( $p < 0.0001$ ) and in vitamin D-supplemental swine (mean  
256  $12.60 \pm 0.66$ ) ( $p < 0.0001$ ). The CD206<sup>+</sup> M2 macrophages in the EAT were significantly greater in  
257 the vitamin D-supplemented than vitamin D-sufficient swine ( $p < 0.05$ ) (Fig 5J).

258

259 **Fig 5: Effect of vitamin D on CD14/CD206 expression.** (A-I) Double immunofluorescence  
260 staining for CD206 and CD14 in EAT of: vitamin D-deficient (Vit.D.Def.), vitamin D-sufficient  
261 (Vit.D.Suf.) and vitamin D-supplemented (Vit.D.Sup.) groups. (A-C) Cy-3 (red) images are  
262 CD206<sup>+</sup> Cells. (D-F) FITC (green) images are all CD14<sup>+</sup> Cells. (J) Data reveals that few cells  
263 were expressing CD206 in vitamin D-deficient swine and more in vitamin D-supplemented  
264 swine than with vitamin D-sufficient swine. (n=3 in each treatment group); \* $p < 0.05$ , \*\*\*\* $p$   
265  $< 0.0001$ .

266

267 We compared the relationship between serum 25(OH)D levels with inflammatory parameters  
268 in the EAT of all swine. The presence of M1 and M2 macrophages in the EAT of each animal is  
269 shown in Fig 6A. Decrease in M1 macrophages with a concomitant increase in M2 macrophages  
270 was observed with the increase in the serum 25(OH)D levels. The level of serum 25(OH)D at  
271 which the net polarization state of the macrophages switched from a predominately M1 state to a  
272 predominately M2 state occurred around 30 ng/mL of serum 25(OH)D. After this point, the rate  
273 of macrophage phenotypic change stabilized. This data was best modeled by exponential decay in  
274 which the R-squared value for the M1 macrophage polarization state is 0.83 and the M2

275 macrophage polarization state is 0.79. Next, in Fig 6B we modeled the relationship between M1  
276 and M2 macrophage polarization by plotting the ratio of the number of M1 macrophages in the  
277 EAT to the number of M2 macrophages in the EAT of the same animal. Once again, the data was  
278 represented by an exponential decay relationship with the R-squared value of 0.90.

279

280 **Fig 6: A scatter plot of the M1 and M2 macrophage.** (A) A representation of the M1 and M2  
281 macrophage count in the epicardial adipose tissue (EAT) of each animal against their serum 25  
282 (OH)D levels. The solid circle (●) represents M1 macrophage count for the swine under 10 high  
283 power field (HPF). The solid square (■) represents M2 macrophage count for the swine under 10  
284 HPF. (B) A scatter plot of the M1/M2 macrophage ratio against their serum 25 (OH)D level in  
285 each animal.

286

287 With increase in the serum 25(OH)D levels, the expression levels of MCP1, TNF- $\alpha$ , CCR7  
288 and CD14 in the EAT were gradually decreased. These results suggest a proactive role of vitamin  
289 D as an immunomodulator in the EAT.

290

## 291 **Discussion**

292 Vitamin D is a critical mediator in calcium-phosphorus homeostasis in bone metabolism as  
293 well as it is a potent immunomodulator and decreases the production of pro-inflammatory  
294 cytokines, while increasing anti-inflammatory mediators. The cytokine milieu determines the  
295 recruitment of either M1 (pro-inflammatory) or M2 (anti-inflammatory) macrophages (Myszka  
296 and Klinger 2014). There are studies demonstrating significant effect of vitamin D deficiency in  
297 the pathogenesis and exacerbation of CAD (Dozio et al. 2015; Verdoia et al. 2014; Seker et al.

298 2014). Also, vitamin D deficiency associates with increased inflammatory markers in EAT and  
299 was shown to induce hypertrophy in cardiac myocytes (Gupta et al. 2012).

300

301 Vitamin D acts through VDR, which is a member of steroid hormone nuclear receptor  
302 superfamily. This regulates transcription of many target genes. VDR is expressed in most of human  
303 tissues, including macrophages, pancreatic beta-cells, epithelial cells, osteoblast. The presence of  
304 VDR in most of the tissues provides a mechanistic link between vitamin D deficiency and the  
305 pathophysiology of the disorders. Recently, increased VDR expression in the medial smooth  
306 muscle cells of the coronary artery was observed in vitamin D deficient rats (Hadjadj L et al.,  
307 2018). Although the exact mechanism is still unclear, the report suggests that the insulin- mediated  
308 coronary arteriole relaxation was affected in the absence of vitamin D and this correlates with  
309 increased expression of VDR.

310

311 In this study, we demonstrated the immunomodulatory effect of vitamin D supplementation  
312 in EAT of hypercholesterolemic swine. The findings of the M1:M2 ratio in our study  
313 demonstrate that there was a significant increase in the number of M1 macrophages in vitamin  
314 D-deficient swine. Vitamin D sufficiency or supplementation significantly increases the density  
315 of M2 macrophages in EAT. Activated M2 macrophages show increased expression of CD206  
316 (mannose receptor) and are involved in tissue repair (Folias et al. 2014). Mannose receptor  
317 (CD206) expression is upregulated by IL-10, thereby recruiting more M2 macrophages and  
318 reduce the inflammatory process (Ding et al. 2012). The M1 macrophages are characterized by  
319 the cell surface expression of CCR7 that plays a role in the activation of inflammatory M1

320 macrophages and migration of T lymphocytes from blood to inflamed tissues. Signals mediated  
321 through CCR7 result in activation and polarization of T cells to Th1 cells (Noor and Wilson  
322 2012). In a study of T cells in mice, a notable inhibitory effect of vitamin D was reported on Th1  
323 cells with a concomitant increase in Th2 cell development (Boonstra et al. 2001).

324  
325 In this present study, we found that swine with serum 25(OH)D levels above 30 ng/ml had a  
326 decrease in inflammatory M1 macrophages and an increase in anti-inflammatory M2  
327 macrophages in the EAT. The difference in macrophage phenotype could be mediated through  
328 the inhibition of IFN- $\gamma$  by vitamin D and the inhibition of M1 macrophage differentiation by IL-  
329 10, which is secreted by M2 macrophages. The inhibition of IFN- $\gamma$  subsequently reduces  
330 macrophage differentiation of the M1 type. Also, as the ratio decreases, the number of M2  
331 macrophages increase. M2 macrophages produce IL-10 which inhibits the differentiation of M1  
332 macrophages. This is supported by our study showing a positive relationship between serum  
333 25(OH)D levels and M2 macrophages, and by the data that M1 macrophages were decreased  
334 with increasing levels of serum 25(OH)D levels. These findings suggest that vitamin D has an  
335 impact by macrophage polarization towards M2 phenotype. The major source of IL-10 is from  
336 M2 macrophages present in the EAT (Norman and Powell 2014; Ouyang et al. 2011). This could  
337 be further supported by the comparison of the ratio of M1:M2 in each treatment group.

338

339 EAT acts like an endocrine organ because it is the source of several bioactive proteins. For  
340 example, proatherogenic (IL-6, TNF- $\alpha$ , MCP1) and anti-inflammatory (IL-10, adiponectin)  
341 adipokines originate in the EAT (Iacobellis 2015). Dozio et al. reported increased gene



342 expression of inflammatory molecules in the EAT of vitamin D-deficient patients with CAD  
343 compared to vitamin D-sufficient and -insufficient patients with CAD (Dozio et al. 2015). In our  
344 study, the levels of TNF- $\alpha$  and MCP1 decreased significantly from vitamin D-deficient to  
345 vitamin D-sufficient but not to the same extent from vitamin D-sufficient to vitamin D-  
346 supplemented groups. This can be explained by the ratio of M1:M2 that decreased dramatically  
347 from vitamin D-deficiency to vitamin D-sufficiency, but the extent at which it decreases from  
348 vitamin D sufficient to vitamin D supplemented group was less. This indicates that the TNF- $\alpha$   
349 and MCP1 levels in EAT are influenced by the M1:M2 ratio. Our results are in accordance with  
350 the report by Giulietti et al. (Giulietti et al. 2007) where the immunomodulatory role of vitamin  
351 D<sub>3</sub> was executed through the down-regulation of TNF- $\alpha$  in monocytes of type 2 diabetic patients.  
352 Vitamin D has been shown to inhibit the production of IL-6, IL-8 and IFN- $\gamma$  by peripheral blood  
353 mononuclear cells in psoriatic patients (Inoue et al. 1998) and also decreases production of pro-  
354 inflammatory cytokines, IL-6 and TNF- $\alpha$ , by inactivating p38 kinase in human monocytes  
355 (Zhang et al. 2012).

356

357 Fat tissues are the major storage site for vitamin D in the body (Lawson et al. 1986; Mawer et  
358 al. 1972). In this study, we did not measure the vitamin D concentration in EAT, as there was a  
359 strong association between EAT and serum vitamin D levels based on a study by Blum et al. who  
360 demonstrated that serum and subcutaneous fat tissue vitamin D<sub>3</sub> concentrations are positively  
361 correlated (Blum et al. 2008). Didriksen and colleagues demonstrated that subcutaneous adipose  
362 tissue could store large amount of vitamin D upon supplementation (Didriksen et al. 2015). It is  
363 not known about how the storage of vitamin D in adipose tissue is regulated and whether the  
364 stored vitamin D plays an active role.

365

## 366 **Conclusion**

367 In conclusion, vitamin D deficiency increases the pro-inflammatory adipokine expression  
368 and the recruitment of M1 macrophages in the EAT. Vitamin D supplementation decreases  
369 inflammatory processes in the EAT and promotes the anti-inflammatory responses in the EAT.  
370 Fig 7 summarizes the key findings and interpretations from our study. Considering the  
371 epidemiological data showing the protective role of vitamin D in several inflammatory diseases,  
372 this study further supports the beneficial effect of vitamin D supplementation in reducing the  
373 burden of coronary artery diseases. To our knowledge this is the first report that shows vitamin  
374 D3 supplementation would regulate inflammatory responses in the EAT and alter macrophage  
375 polarization.

376

377 **Fig 7: Pictorial representation of the effects of vitamin D in regulating pro-inflammatory**  
378 **signaling in the epicardial adipose tissue (EAT). Vascular smooth muscle cells (VSMC).**

379

## 380 **Acknowledgments**

381 The authors thank their colleagues in the laboratory in handling and monitoring swine at various  
382 stages of the project.

383

## 384 **Funding**

385 This work was supported by research grants R01HL116042 and R01HL120659 from the  
386 National Institutes of Health, USA to DK Agrawal. The content of this review article is solely

387 the responsibility of the authors and does not necessarily represent the official views of the  
388 National Institutes of Health.

389

## 390 **Conflict of Interest Statement**

391 The corresponding author received research grants from the National Institutes of Health,  
392 USA, and has no other financial interest or disclosure. The authors have no relevant affiliations or  
393 financial involvement with any organization or entity with financial interest or financial conflict  
394 with the subject matter or materials discussed in the manuscript apart from those disclosed. Thus,  
395 the authors have declared that no competing interests exist. No writing assistance was utilized in  
396 the production of this manuscript.

397

## 398 **References**

- 399 Blum, M., G. Dolnikowski, E. Seyoum, S. S. Harris, S. L. Booth, J. Peterson, E. Saltzman, and  
400 B. Dawson-Hughes. 2008. Vitamin D(3) in fat tissue. *Endocrine* 33 (1) (Feb): 90-4. DOI:  
401 10.1007/s12020-008-9051-4
- 402 Boonstra, A., F. J. Barrat, C. Crain, V. L. Heath, H. F. Savelkoul, and A. O'Garra. 2001.  
403 1alpha,25-dihydroxyvitamin d3 has a direct effect on naive CD4(+) T cells to enhance the  
404 development of Th2 cells. *Journal of Immunology (Baltimore, Md.: 1950)* 167 (9) (Nov 1):  
405 4974-80. DOI: <https://doi.org/10.4049/jimmunol.167.9.4974>
- 406 Didriksen, A., A. Burild, J. Jakobsen, O. M. Fuskevag, and R. Jorde. 2015. Vitamin D3 increases  
407 in abdominal subcutaneous fat tissue after supplementation with vitamin D3. *European*  
408 *Journal of Endocrinology / European Federation of Endocrine Societies* 172 (3) (Mar): 235-  
409 41. DOI: 10.1530/EJE-14-0870
- 410 Ding, C., D. Gao, J. Wilding, P. Trayhurn, and C. Bing. 2012. Vitamin D signalling in adipose  
411 tissue. *The British Journal of Nutrition* 108 (11) (Dec 14): 1915-23. DOI:  
412 10.1017/S0007114512003285

- 413 Dozio, E., S. Briganti, E. Vianello, G. Dogliotti, A. Barassi, A. E. Malavazos, F. Ermetici, et al.  
414 2015. Epicardial adipose tissue inflammation is related to vitamin D deficiency in patients  
415 affected by coronary artery disease. *Nutrition, Metabolism, and Cardiovascular Diseases* :  
416 *NMCD* 25 (3) (Mar): 267-73. DOI: 10.1016/j.numecd.2014.08.012
- 417 Folias, A. E., C. Penaranda, A. L. Su, J. A. Bluestone, and M. Hebrok. 2014. Aberrant innate  
418 immune activation following tissue injury impairs pancreatic regeneration. *PloS One* 9 (7)  
419 (Jul 10): e102125. DOI: 10.1371/journal.pone.0102125
- 420 Giulietti, A., E. van Etten, L. Overbergh, K. Stoffels, R. Bouillon, and C. Mathieu. 2007.  
421 Monocytes from type 2 diabetic patients have a pro-inflammatory profile. 1,25-  
422 dihydroxyvitamin D(3) works as anti-inflammatory. *Diabetes Research and Clinical  
423 Practice* 77 (1) (Jul): 47-57.
- 424 Gupta, G. K., T. Agrawal, M. G. DelCore, S. M. Mohiuddin, and D. K. Agrawal. 2012. Vitamin  
425 D deficiency induces cardiac hypertrophy and inflammation in epicardial adipose tissue in  
426 hypercholesterolemic swine. *Experimental and Molecular Pathology* 93 (1) (Aug): 82-90.
- 427 Hadjadj, L., S. Varbiro, E. M. Horvath, A. Monori-Kiss, E. Pal, G. B. Karvaly, A. Heinzlmann,  
428 et al. 2018. Insulin resistance in an animal model of polycystic ovary disease is aggravated  
429 by vitamin D deficiency: Vascular consequences. *Diabetes & Vascular Disease Research*  
430 (Feb 1).
- 431 Hirata, Y., M. Tabata, H. Kurobe, T. Motoki, M. Akaike, C. Nishio, M. Higashida, et al. 2011.  
432 Coronary atherosclerosis is associated with macrophage polarization in epicardial adipose  
433 tissue. *Journal of the American College of Cardiology* 58 (3) (Jul 12): 248-55.  
434 DOI: 10.1016/j.jacc.2011.01.048Hypponen, E., B. J. Boucher, D. J. Berry, and C. Power.  
435 2008. 25-hydroxyvitamin D, IGF-1, and metabolic syndrome at 45 years of age: A cross-  
436 sectional study in the 1958 british birth cohort. *Diabetes* 57 (2) (Feb): 298-305.
- 437 Iacobellis, G. 2015. Local and systemic effects of the multifaceted epicardial adipose tissue  
438 depot. *Nature Reviews.Endocrinology* 11 (6) (Jun): 363-71.
- 439 Iacobellis, G., and A. C. Bianco. 2011. Epicardial adipose tissue: Emerging physiological,  
440 pathophysiological and clinical features. *Trends in Endocrinology and Metabolism: TEM* 22  
441 (11) (Nov): 450-7.
- 442 Inoue, M., T. Matsui, A. Nishibu, Y. Nihei, K. Iwatsuki, and F. Kaneko. 1998. Regulatory  
443 effects of 1alpha,25-dihydroxyvitamin D3 on inflammatory responses in psoriasis.  
444 *European Journal of Dermatology* : *EJD* 8 (1) (Jan-Feb): 16-20.
- 445 Ku, Y. C., M. E. Liu, C. S. Ku, T. Y. Liu, and S. L. Lin. 2013. Relationship between vitamin D  
446 deficiency and cardiovascular disease. *World Journal of Cardiology* 5 (9) (Sep 26): 337-46.

- 447 Lawson, D. E., J. Douglas, M. Lean, and S. Sedrani. 1986. Estimation of vitamin D3 and 25-  
448 hydroxyvitamin D3 in muscle and adipose tissue of rats and man. *Clinica Chimica Acta*;  
449 *International Journal of Clinical Chemistry* 157 (2) (Jun 15): 175-81.
- 450 Lehmann, U., F. Hirche, G. I. Stangl, K. Hinz, S. Westphal, and J. Dierkes. 2013. Bioavailability  
451 of vitamin D(2) and D(3) in healthy volunteers, a randomized placebo-controlled trial. *The*  
452 *Journal of Clinical Endocrinology and Metabolism* 98 (11) (Nov): 4339-45.
- 453 Levin, G. P., C. Robinson-Cohen, I. H. de Boer, D. K. Houston, K. Lohman, Y. Liu, S. B.  
454 Kritchevsky, et al. 2012. Genetic variants and associations of 25-hydroxyvitamin D  
455 concentrations with major clinical outcomes. *Jama* 308 (18) (Nov 14): 1898-905.
- 456 Looker, A. C., C. L. Johnson, D. A. Lacher, C. M. Pfeiffer, R. L. Schleicher, and C. T. Sempos.  
457 2011. Vitamin D status: United states, 2001-2006. *NCHS Data Brief*(59) (59) (Mar): 1-8.
- 458 Mawer, E. B., J. Backhouse, C. A. Holman, G. A. Lumb, and S. W. Stanbury. 1972. The  
459 distribution and storage of vitamin D and its metabolites in human tissues. *Clinical Science*  
460 43 (3) (Sep): 413-31.
- 461 Mazurek, T., L. Zhang, A. Zalewski, J. D. Mannion, J. T. Diehl, H. Arafat, L. Sarov-Blat, et al.  
462 2003. Human epicardial adipose tissue is a source of inflammatory mediators. *Circulation*  
463 108 (20) (Nov 18): 2460-6.
- 464 Mozos, I., and O. Marginean. 2015. Links between vitamin D deficiency and cardiovascular  
465 diseases. *BioMed Research International* 2015 : 109275.
- 466 Myszka, M., and M. Klinger. 2014. The immunomodulatory role of vitamin D. *Postepy Higieny i*  
467 *Medycyny Doswiadczonej (Online)* 68 : 865-78.
- 468 Noor, S., and E. H. Wilson. 2012. Role of C-C chemokine receptor type 7 and its ligands during  
469 neuroinflammation. *Journal of Neuroinflammation* 9 (Apr 25): 77,2094-9-77.
- 470 Norman, A. W., R. Bouillon, S. J. Whiting, R. Vieth, and P. Lips. 2007. 13th workshop  
471 consensus for vitamin D nutritional guidelines. *The Journal of Steroid Biochemistry and*  
472 *Molecular Biology* 103 (3-5) (Mar): 204-5.
- 473 Norman, P. E., and J. T. Powell. 2014. Vitamin D and cardiovascular disease. *Circulation*  
474 *Research* 114 (2) (Jan 17): 379-93.
- 475 Norman, P. E., and J. T. Powell. 2005. Vitamin D, shedding light on the development of disease  
476 in peripheral arteries. *Arteriosclerosis, Thrombosis, and Vascular Biology* 25 (1) (Jan): 39-  
477 46.
- 478 Ouyang, W., S. Rutz, N. K. Crellin, P. A. Valdez, and S. G. Hymowitz. 2011. Regulation and  
479 functions of the IL-10 family of cytokines in inflammation and disease. *Annual Review of*  
480 *Immunology* 29 : 71-109.

- 481 Sacks, H. S., and J. N. Fain. 2007. Human epicardial adipose tissue: A review. *American Heart*  
482 *Journal* 153 (6) (Jun): 907-17.
- 483 Scragg, R., I. Holdaway, V. Singh, P. Metcalf, J. Baker, and E. Dryson. 1995. Serum 25-  
484 hydroxyvitamin D3 levels decreased in impaired glucose tolerance and diabetes mellitus.  
485 *Diabetes Research and Clinical Practice* 27 (3) (Mar): 181-8.
- 486 Scragg, R., R. Jackson, I. M. Holdaway, T. Lim, and R. Beaglehole. 1990. Myocardial infarction  
487 is inversely associated with plasma 25-hydroxyvitamin D3 levels: A community-based  
488 study. *International Journal of Epidemiology* 19 (3) (Sep): 559-63.
- 489 Seker, T., M. Gur, G. Yuksel Kalkan, O. Kuloglu, N. Yildiz Koyunsever, D. Yildiray Sahin, C.  
490 Turkoglu, et al. 2014. Serum 25-hydroxyvitamin D level and extent and complexity of  
491 coronary artery disease. *Journal of Clinical Laboratory Analysis* 28 (1) (Jan): 52-8.
- 492 Verdoia, M., A. Schaffer, C. Sartori, L. Barbieri, E. Casetti, P. Marino, G. Galasso, and G. De  
493 Luca. 2014. Vitamin D deficiency is independently associated with the extent of coronary  
494 artery disease. *European Journal of Clinical Investigation* 44 (7) (Jul): 634-42.
- 495 Wang, T. J., M. J. Pencina, S. L. Booth, P. F. Jacques, E. Ingelsson, K. Lanier, E. J. Benjamin, R.  
496 B. D'Agostino, M. Wolf, and R. S. Vasan. 2008. Vitamin D deficiency and risk of  
497 cardiovascular disease. *Circulation* 117 (4) (Jan 29): 503-11.
- 498 Zhang, Y., D. Y. Leung, B. N. Richers, Y. Liu, L. K. Remigio, D. W. Riches, and E. Goleva.  
499 2012. Vitamin D inhibits monocyte/macrophage proinflammatory cytokine production by  
500 targeting MAPK phosphatase-1. *Journal of Immunology (Baltimore, MD.: 1950)* 188 (5)  
501 (Mar 1): 2127-35.

Serum 25(OH)D level ng/ml

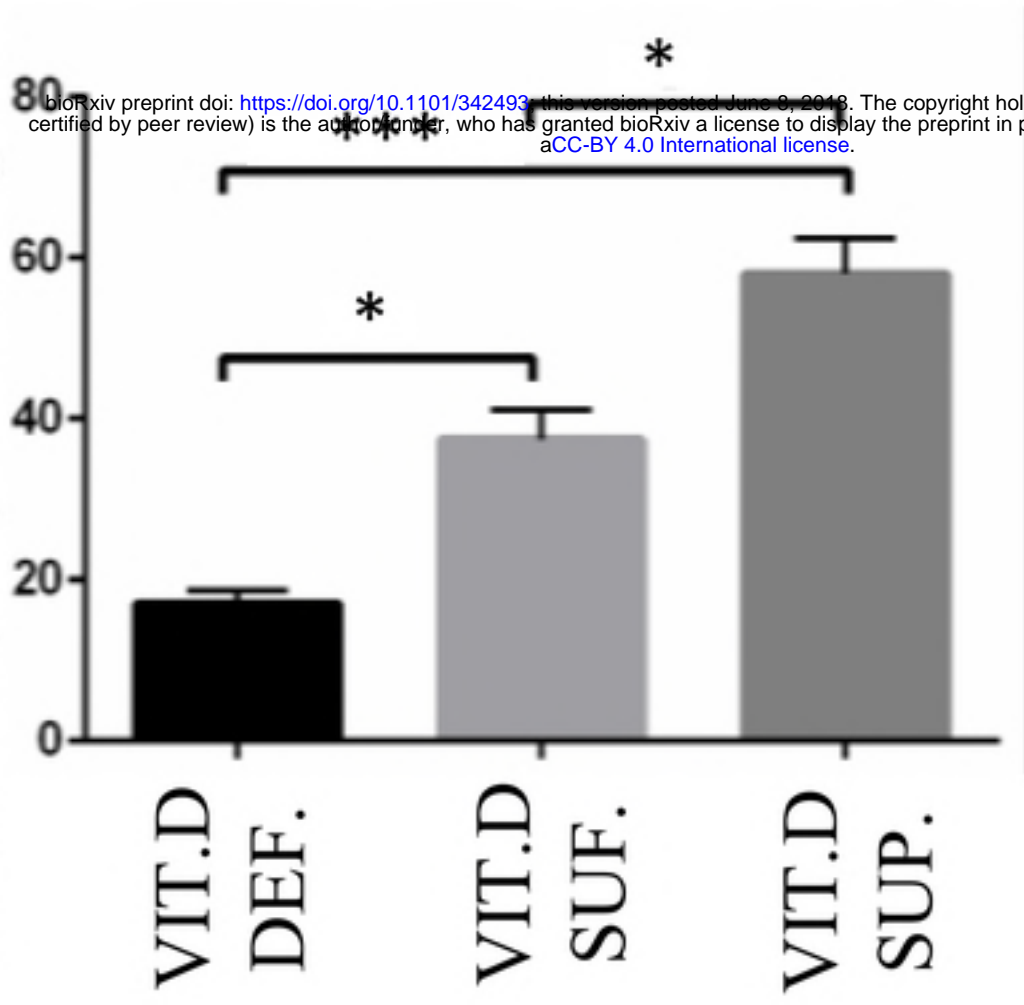



Vit. D DEF.

Vit. D SUF.

Vit. D SUP.

(A)

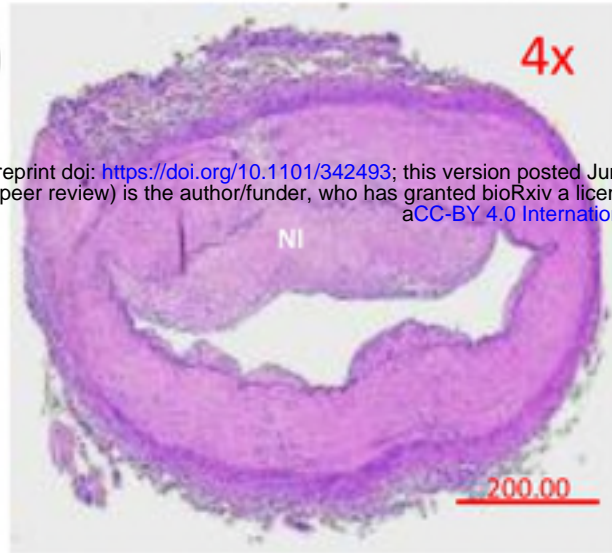

(B)

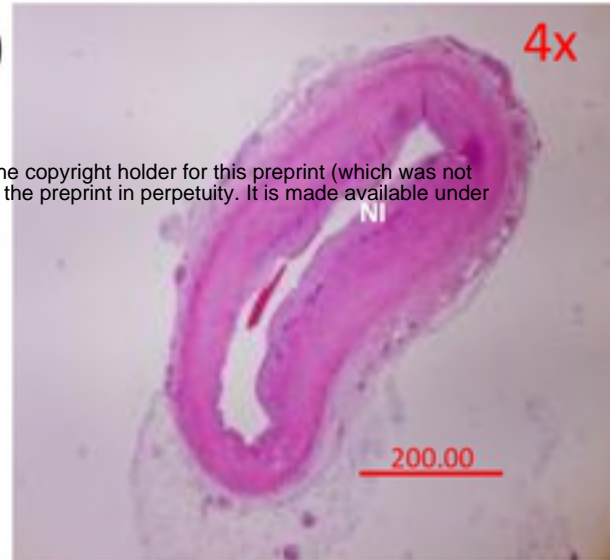

(C)

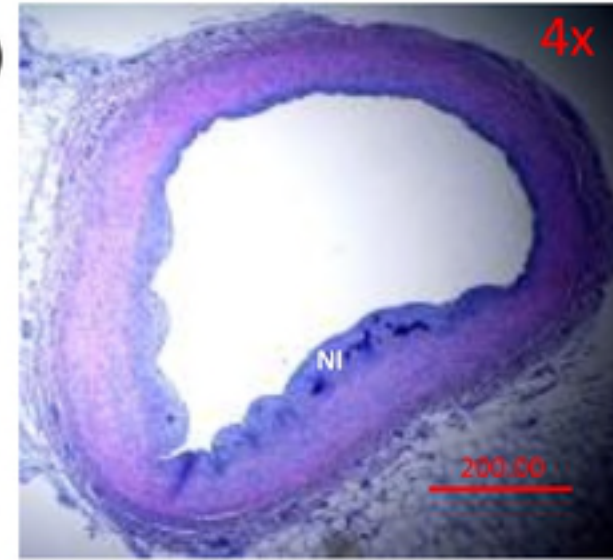

H&E

(D)

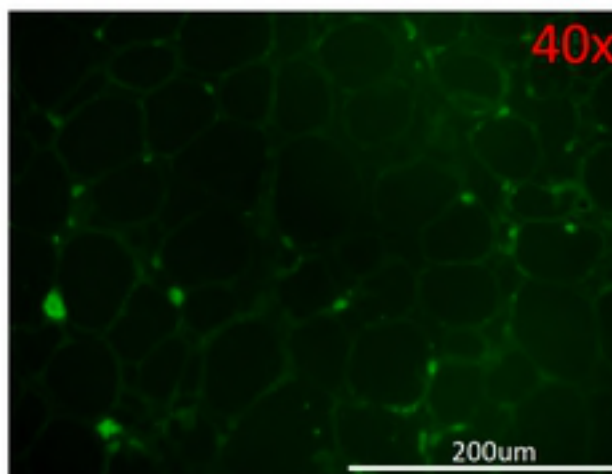

(E)

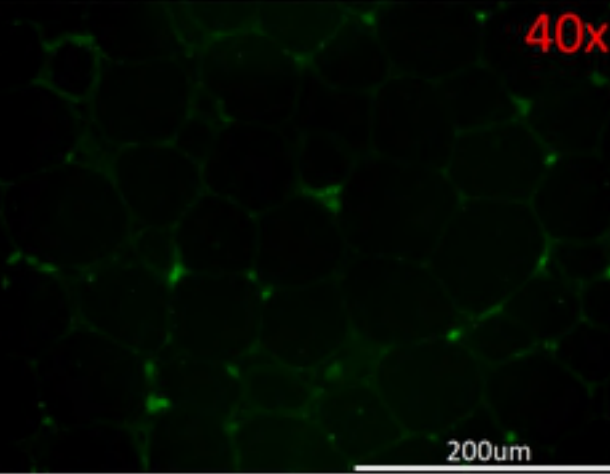

(F)

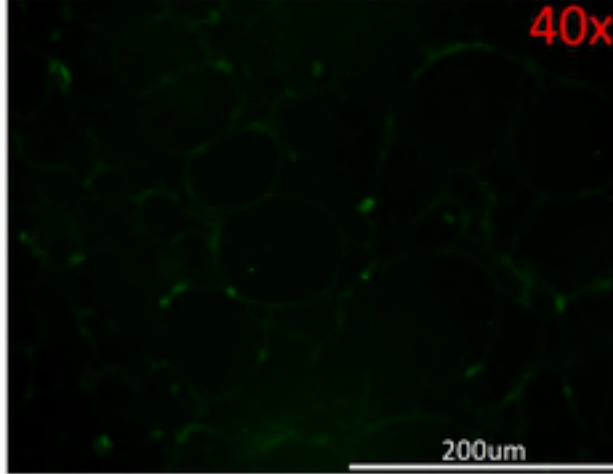

VDR+  
Cells

(G)

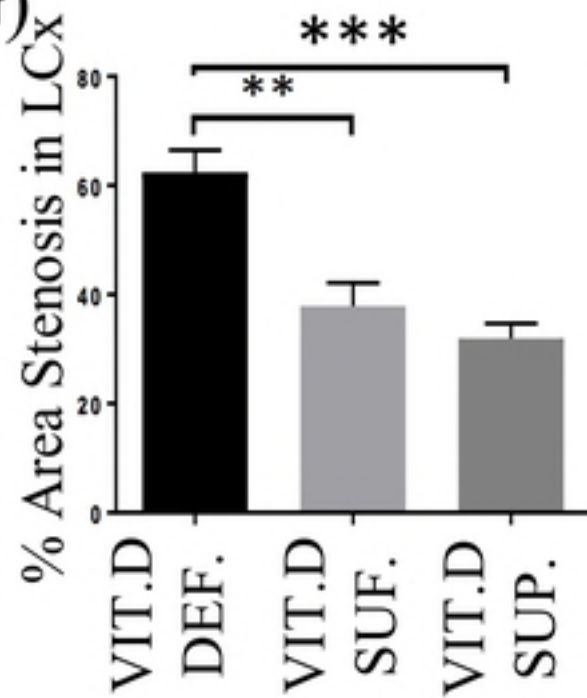

(H)

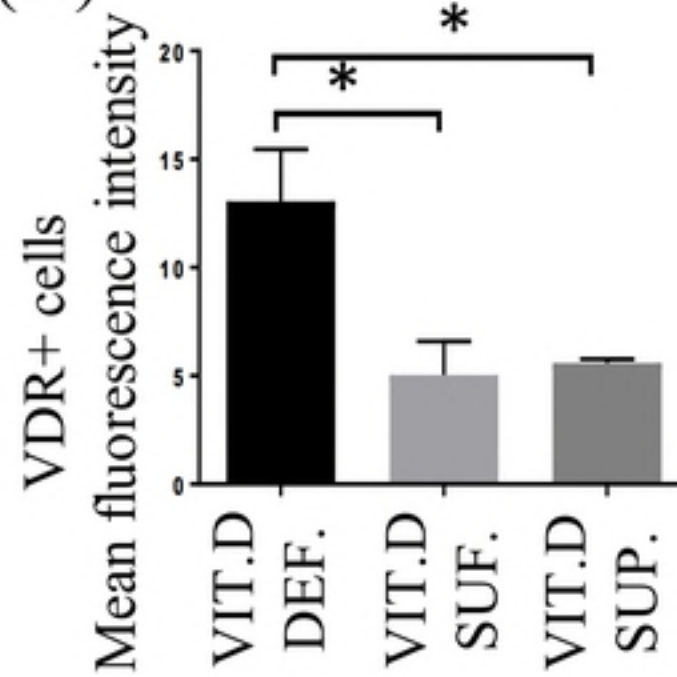

(I)

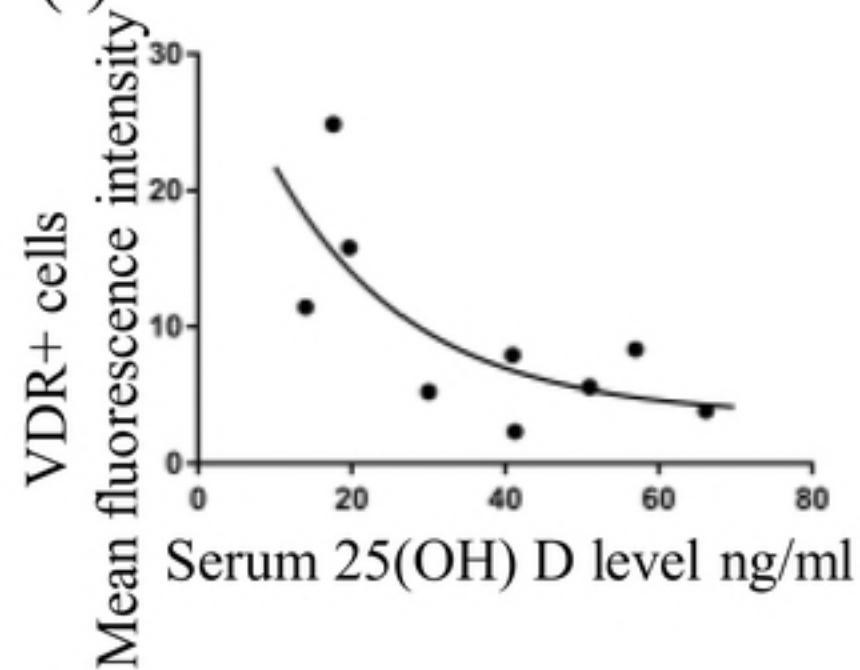



Vit. D DEF.

Vit. D SUF.

Vit. D SUP.

bioRxiv preprint doi: <https://doi.org/10.1101/342493>; this version posted June 1, 2018. The copyright holder for this preprint (which was not certified by peer review) is the author/funder, who has granted bioRxiv a license to display the preprint in perpetuity. It is made available under aCC-BY 4.0 International license.

TNF- $\alpha$  +  
Cells

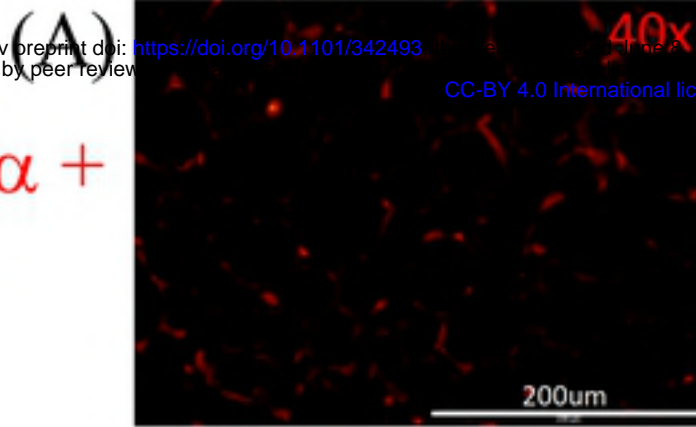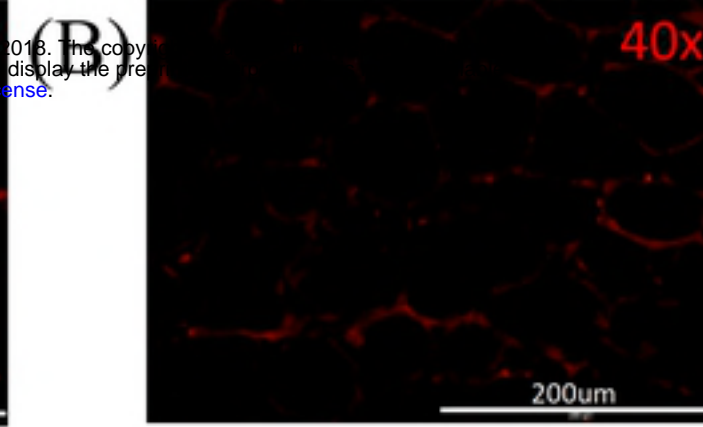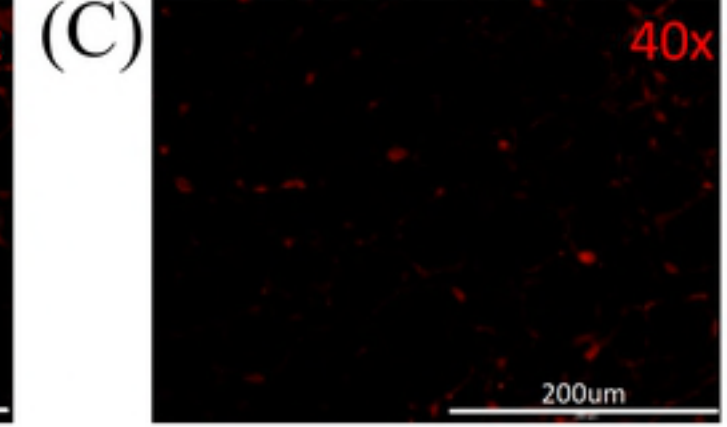

MCP1+  
Cells

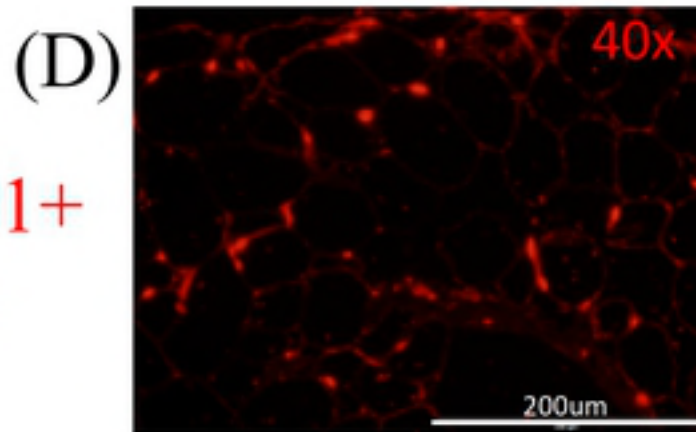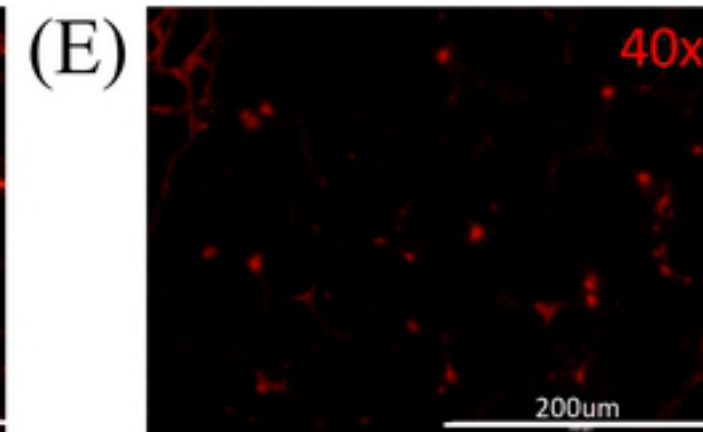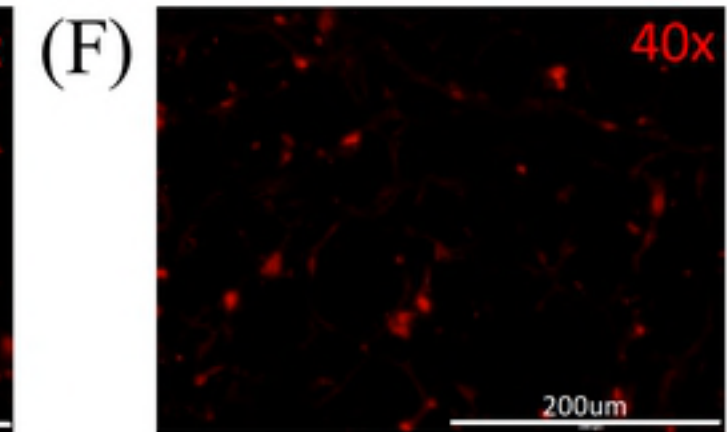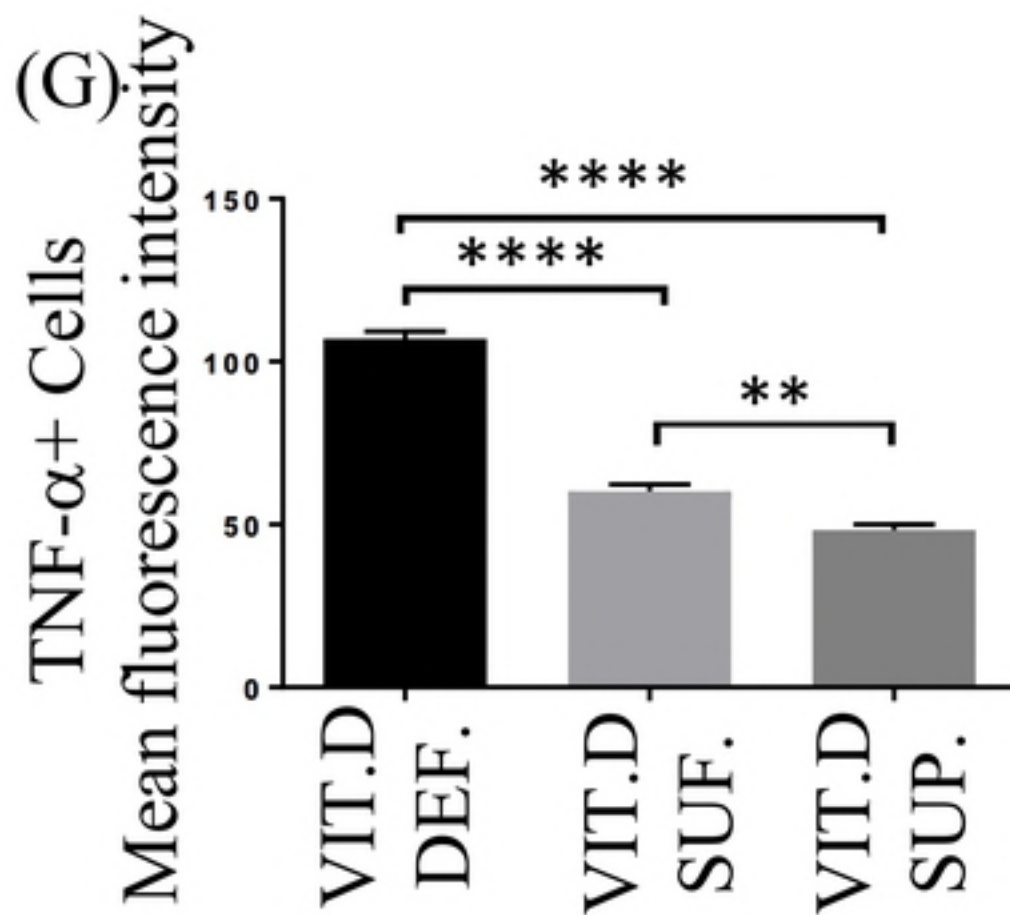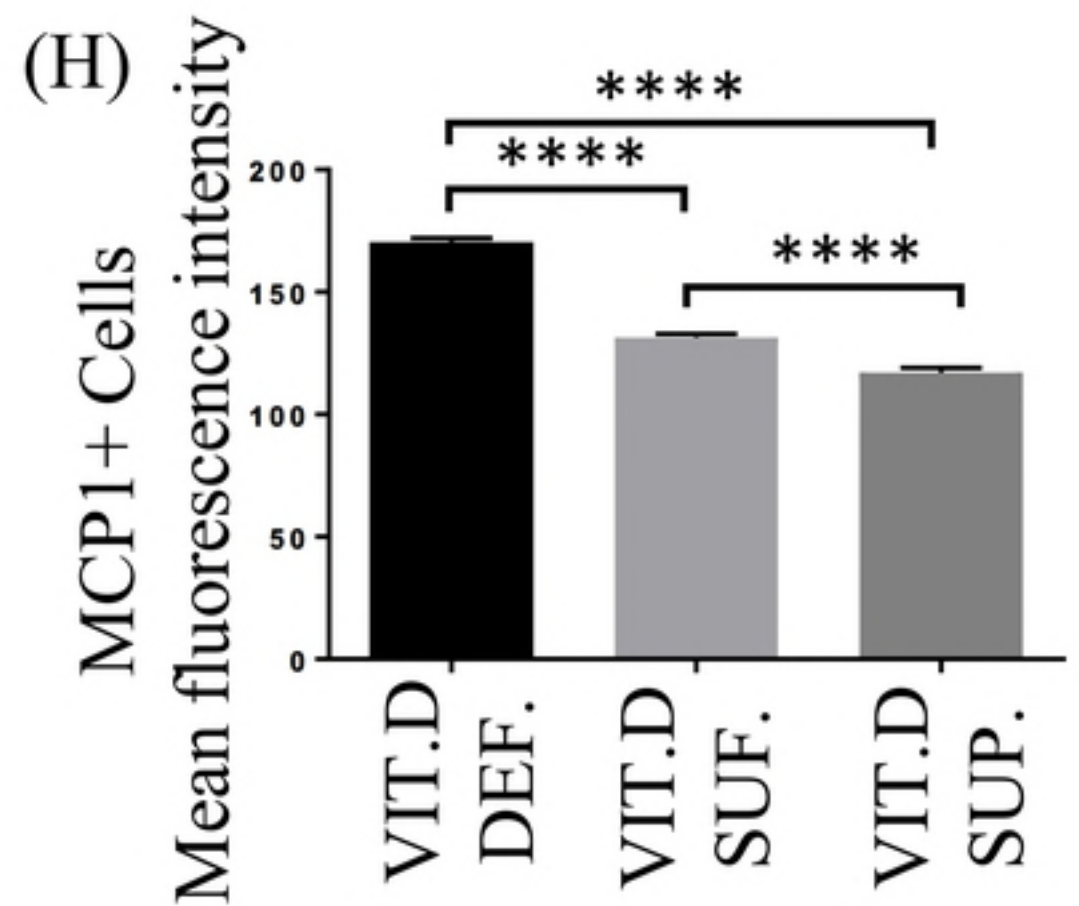

Vit. D DEF.

Vit. D SUF.

Vit. D SUP.

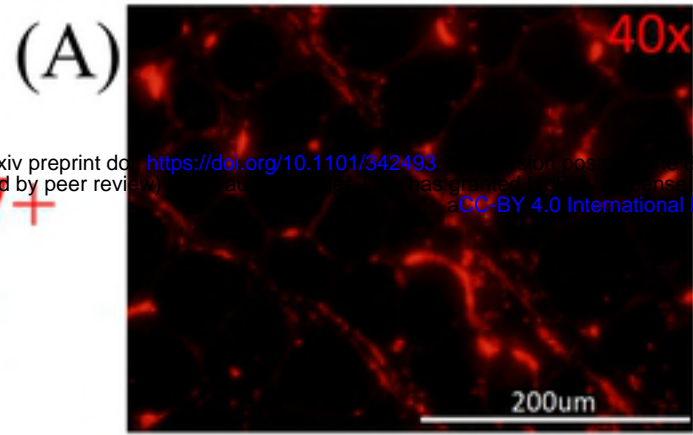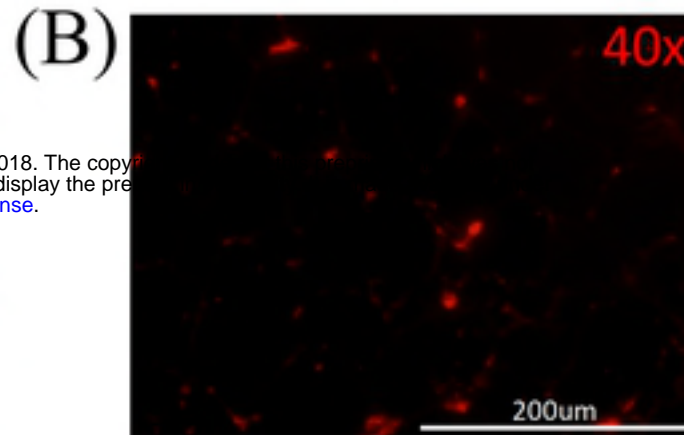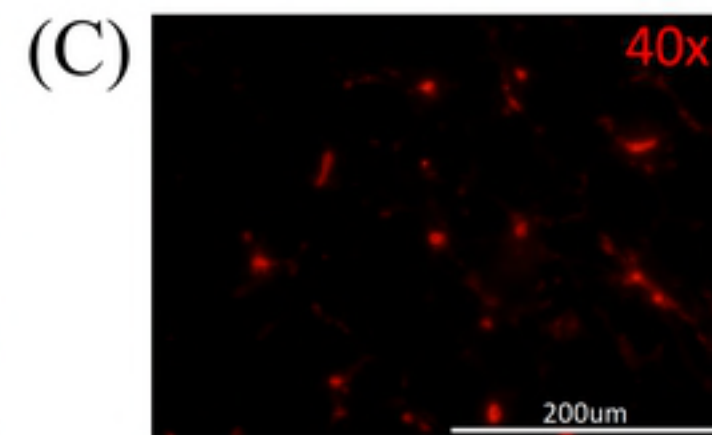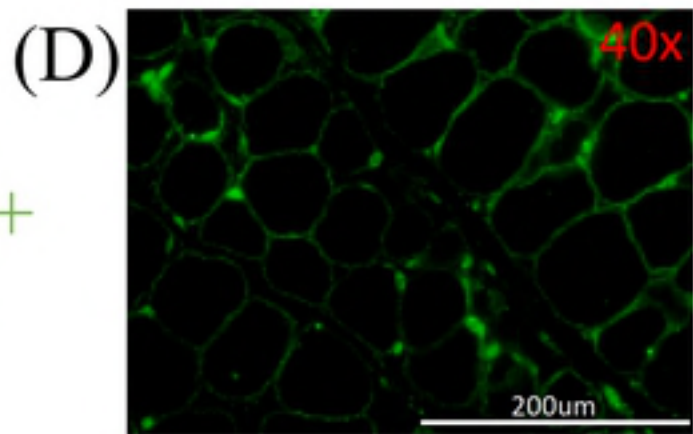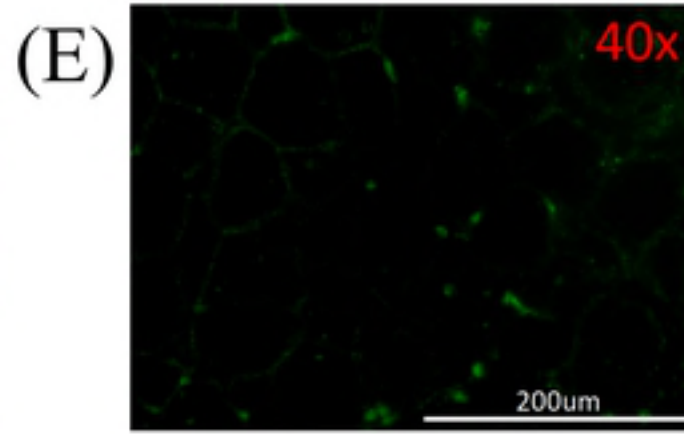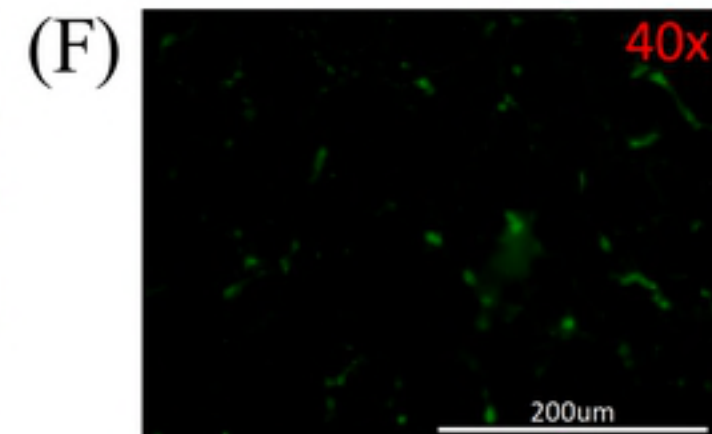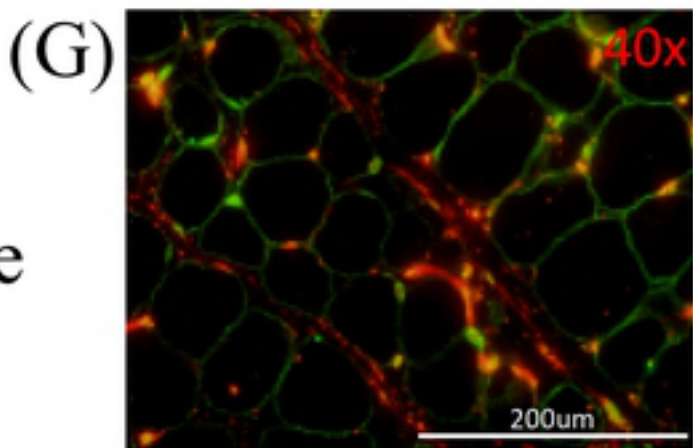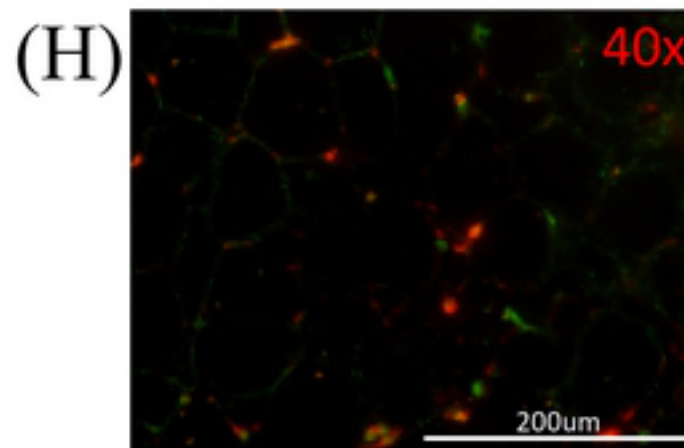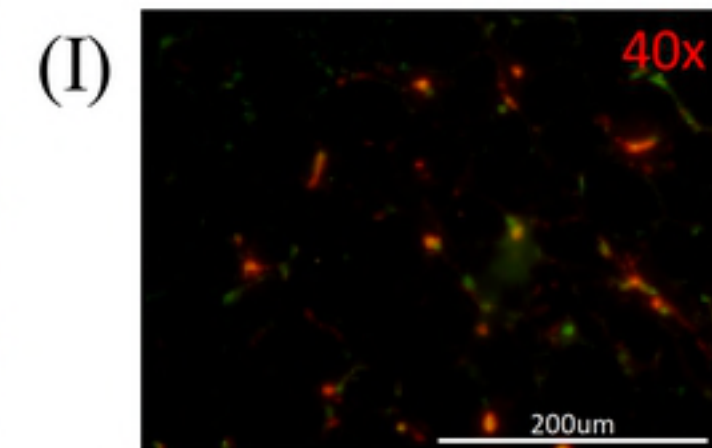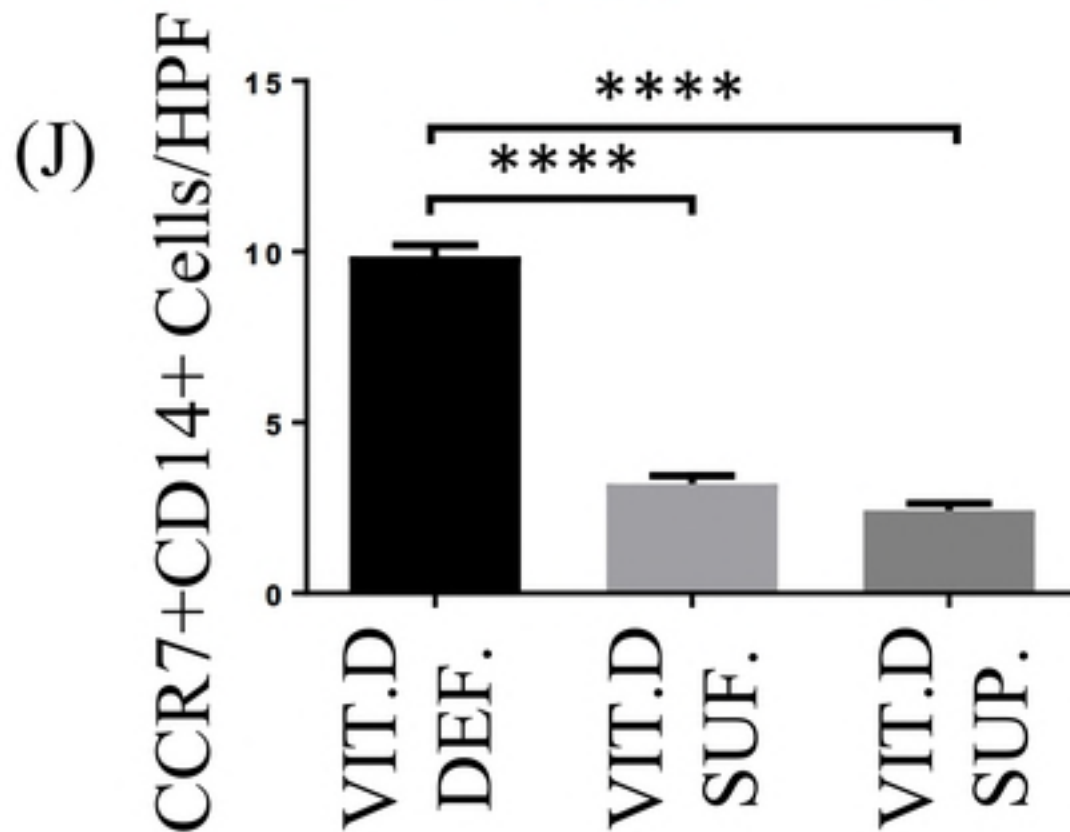



Vit. D DEF.

Vit. D SUF.

Vit. D SUP.

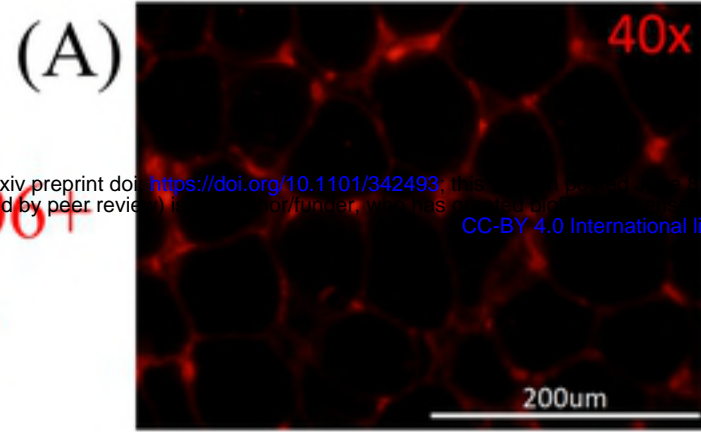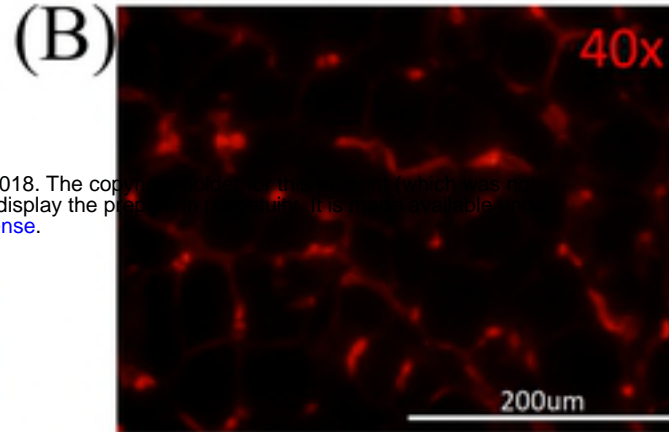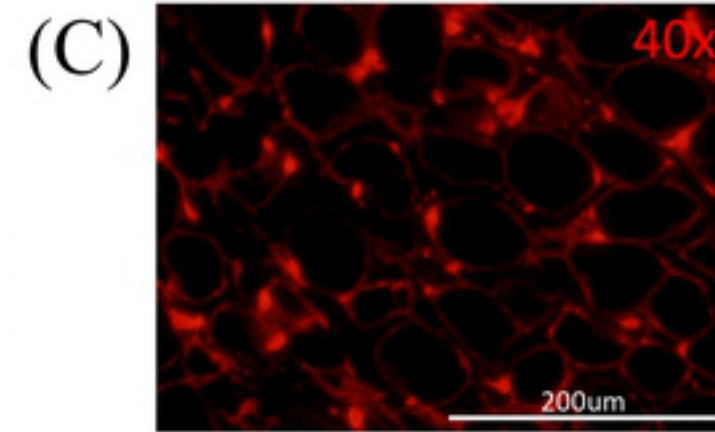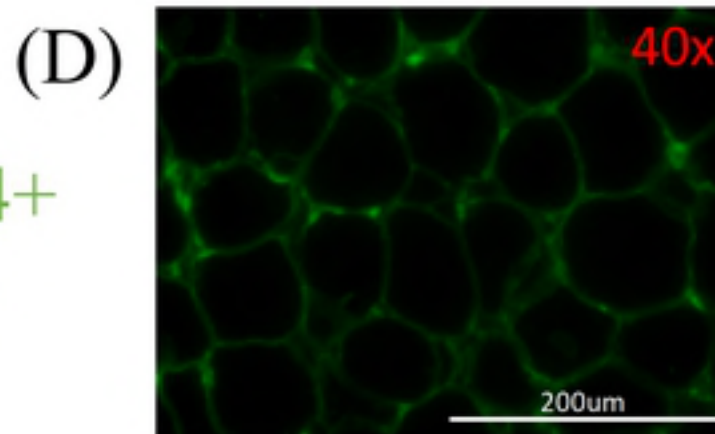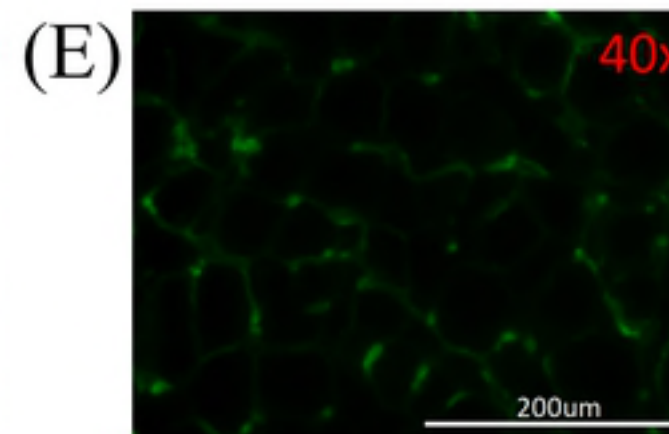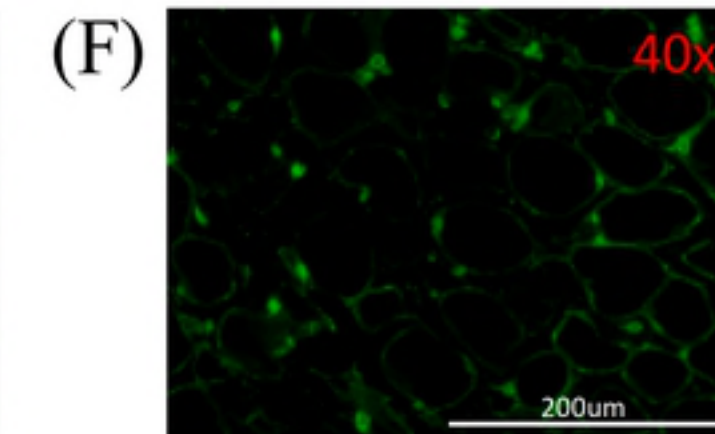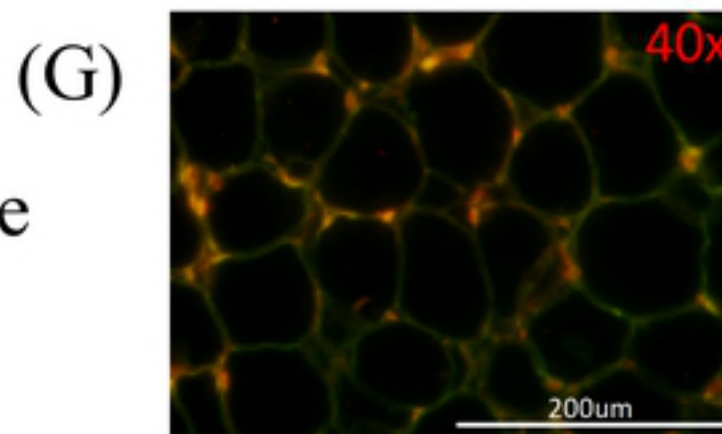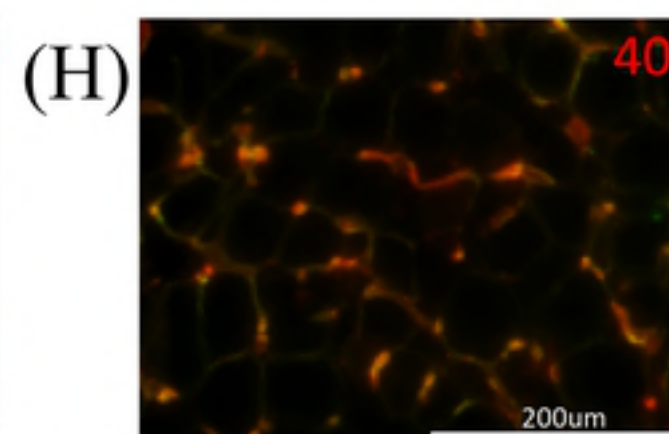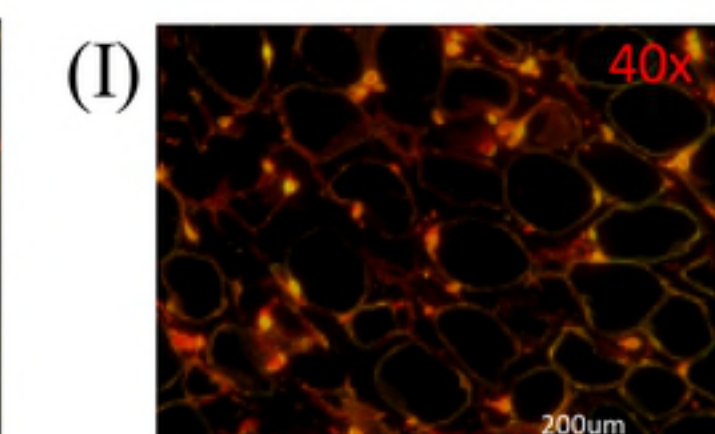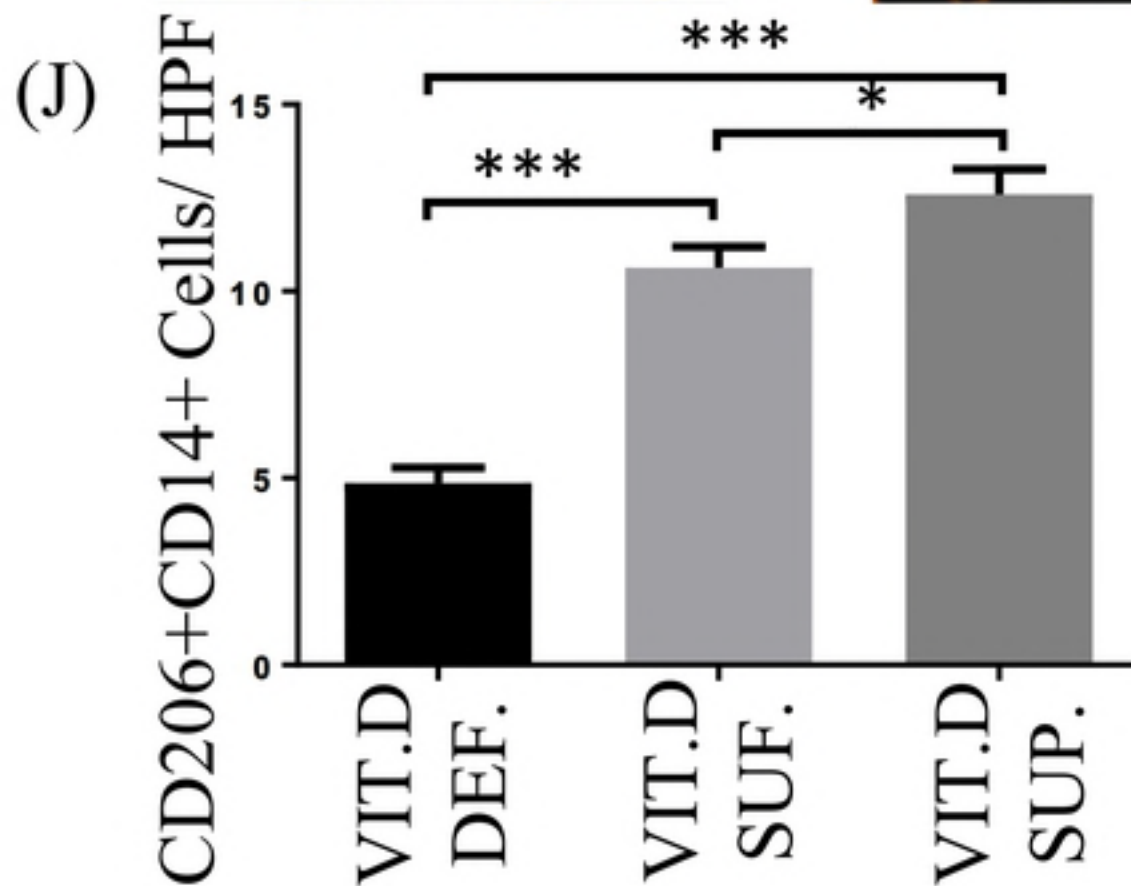

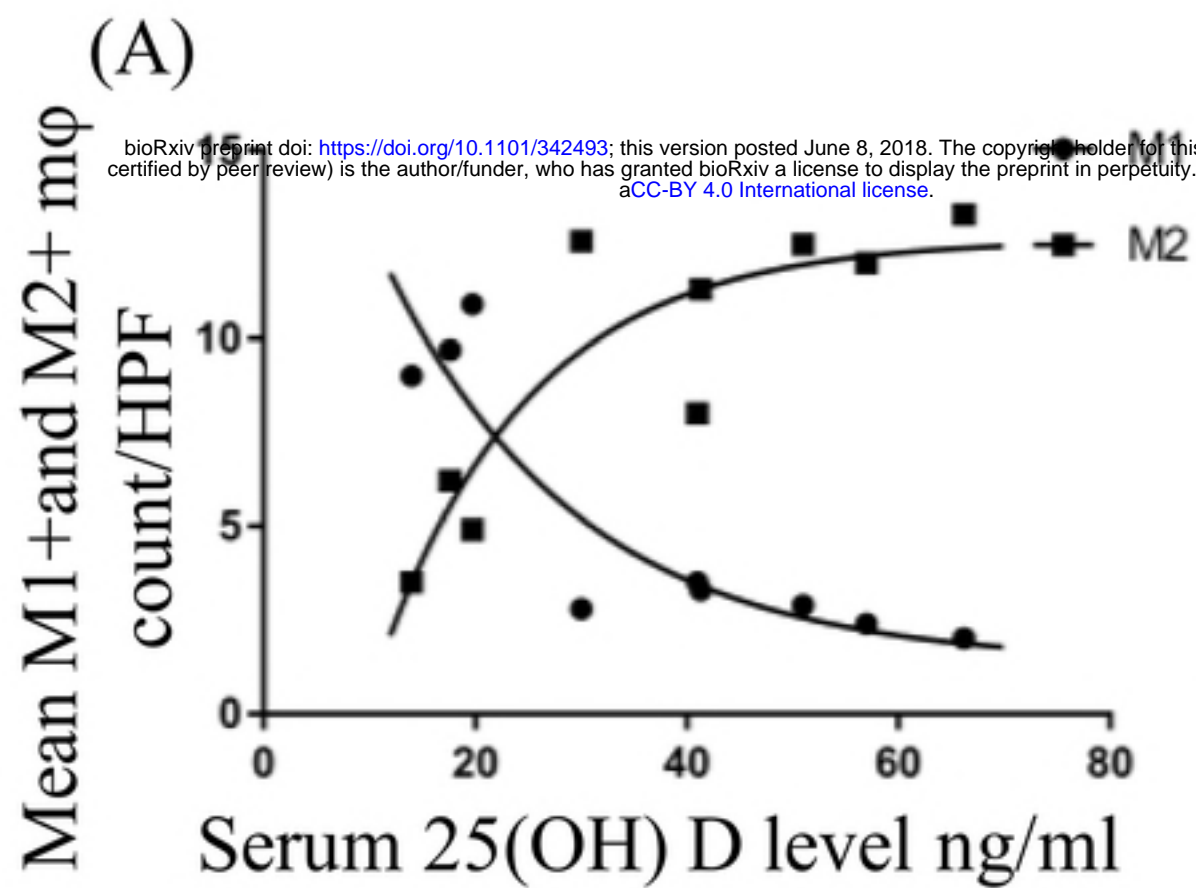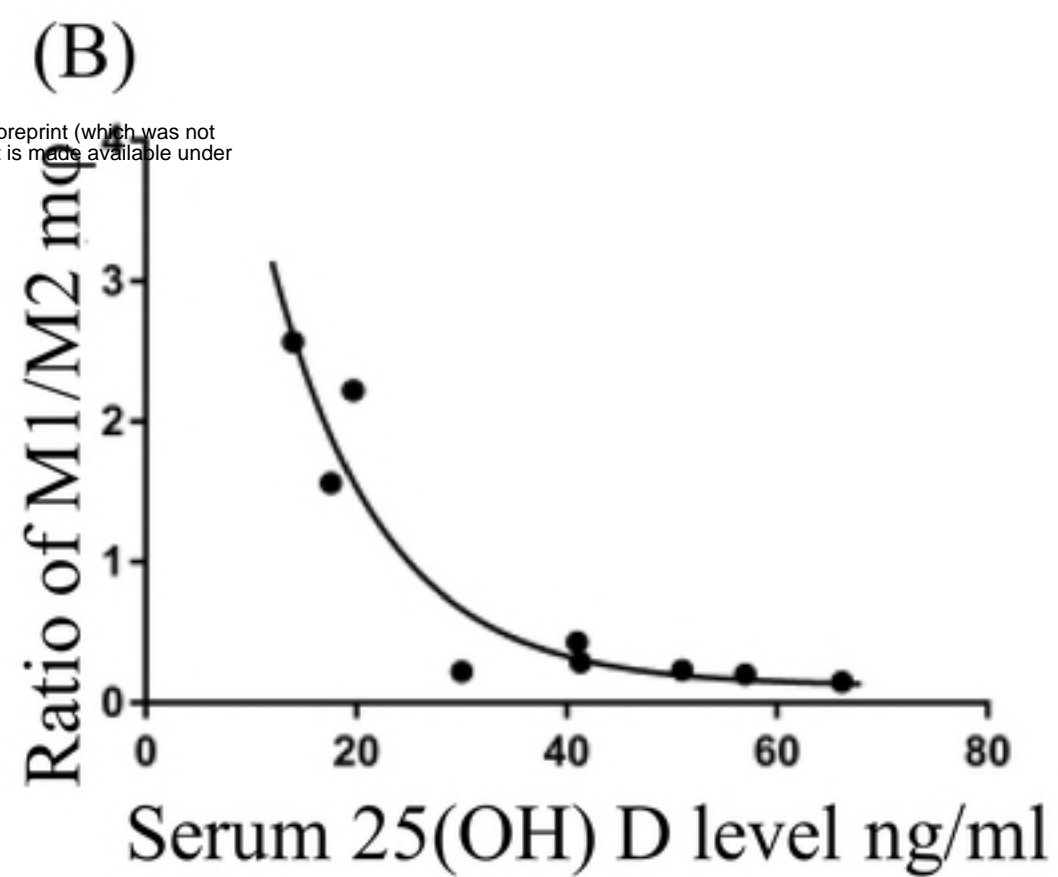

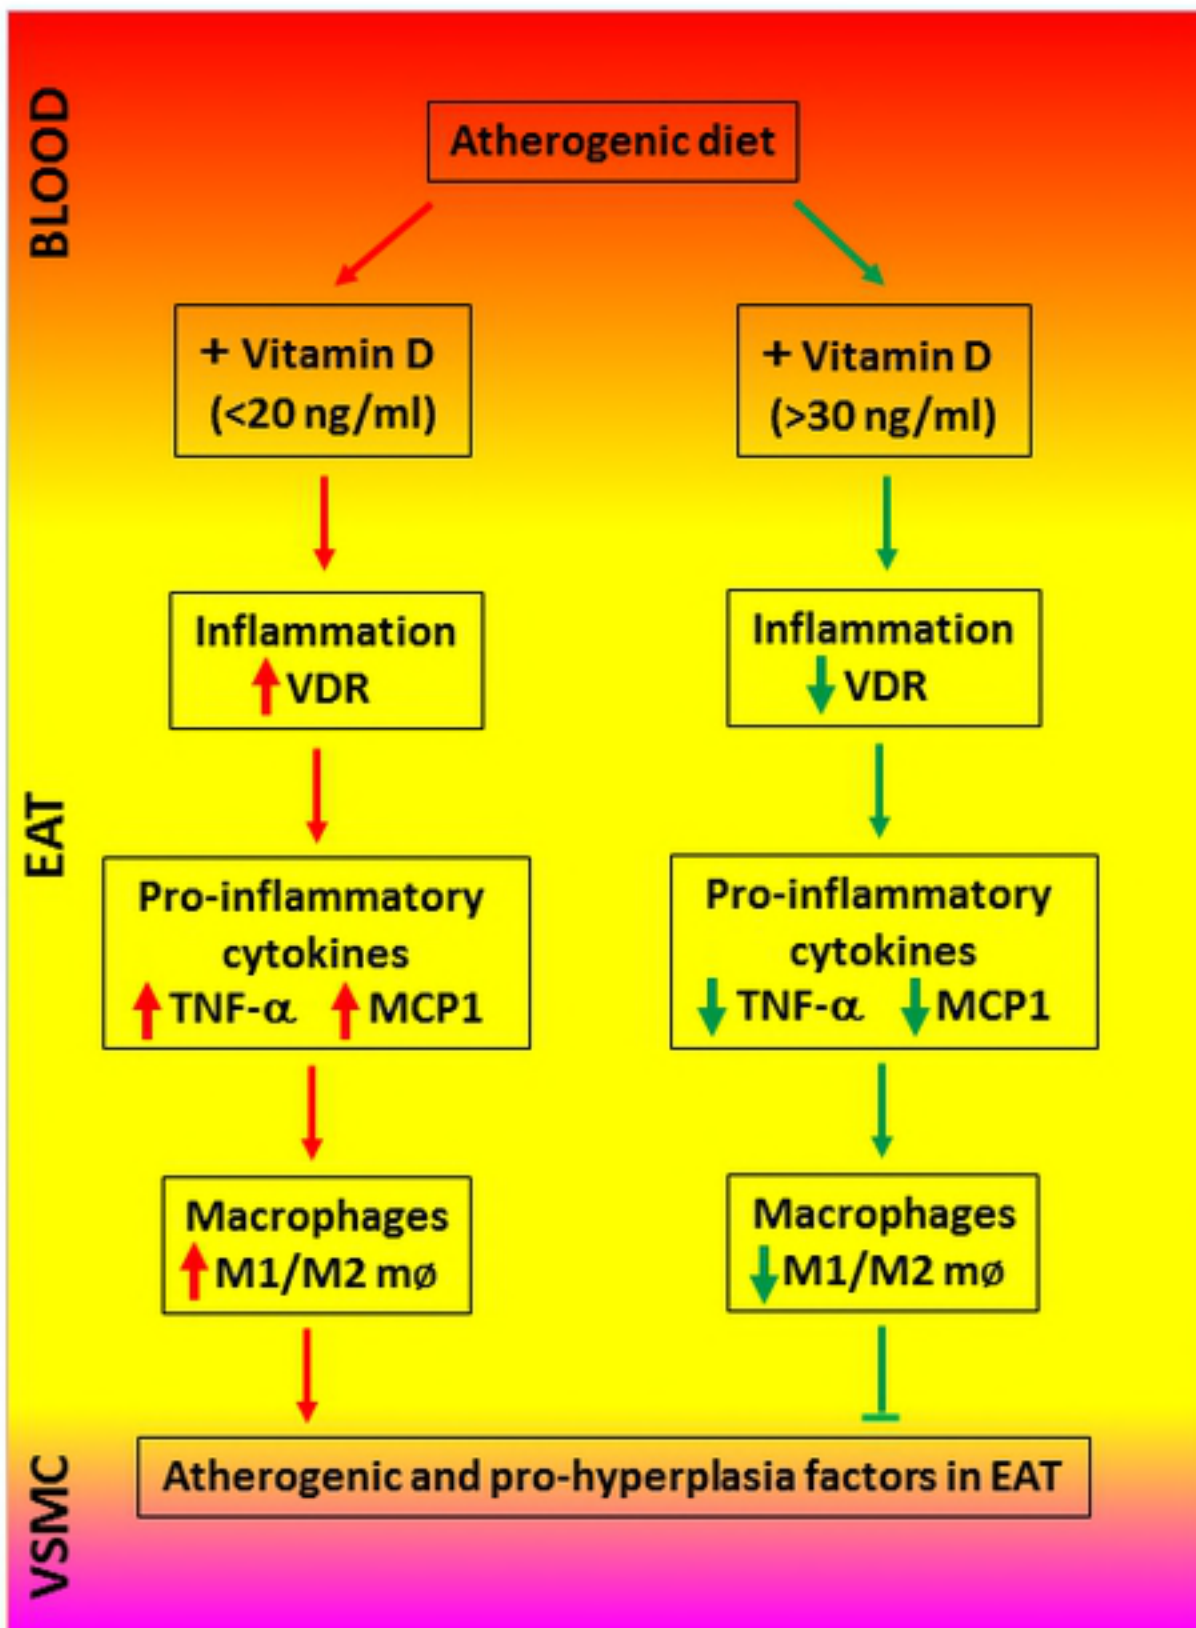

Source: https://www.biorxiv.org/content/10.1101/342493v1.full.pdf
